# Supplementary material for: Efficacy of Different Testing Scenarios in Reducing Transfusion-Transmitted Hepatitis B Virus (TT-HBV) Infection Risk
Source: MDPI journal article supplement (doi:10.3390/v14102263), 2022-10-15
Supplement: s1 [file s1]

Supplementary Tables - manuscript viruses-1954196  
Lelie et al - Efficacy of HBV testing scenarios

**Supplementary table S1.** Comparison of Ultrio Plus to Ultrio HBV NAT yield rates observed in sequential screening periods and calculated enhancement factors per infection stage and donation category in South-Africa [7] and Hong Kong [8] (between brackets corrected for HBsAg prevalence reduction factor).

| Blood center (country)           | HKRCBS (Hong Kong)   |                  |                               | SANBS (South Africa) |                  |                               |
|----------------------------------|----------------------|------------------|-------------------------------|----------------------|------------------|-------------------------------|
| Prevalent HBV genotypes          | genotype B, C        |                  |                               | genotype A1          |                  |                               |
|                                  | yield (rate/million) |                  | UP/U yield rate factor (..) ^ | yield (rate/million) |                  | UP/U yield rate factor (..) ^ |
| NAT assay screening period       | Ultrio (U)           | Ultrio Plus (UP) |                               | Ultrio (U)           | Ultrio Plus (UP) |                               |
| <b>Frist time donations</b>      | <b>92551</b>         | <b>80565</b>     |                               | <b>90871</b>         | <b>98656</b>     |                               |
| Window period                    | 4 (43.2)             | 4 (49.6)         | 1.15 (1.86)                   | 9 (99.0)             | 19 (192.6)       | 1.94 (2.04)                   |
| HBsAg+/DNA+                      | 1550 (16747.5)       | 866 (10749.1)    | 0.64 (1.03)                   | 697 (7670.1)         | 742 (7521.1)     | 0.98 (1.02)                   |
| HBsAg+/DNA-                      | 143 (1545.1)         | 43 (533.7)       | 0.35 (0.56)                   | 34 (374.2)           | 16 (162.2)       | 0.43 (0.45)                   |
| all HBsAg                        | 1693 (18292.6)       | 909 (11282.8)    | 0.62                          | 731 (8044.4)         | 758 (7683.3)     | 0.96                          |
| OBI                              | 12 (129.7)           | 27 (335.1)       | 2.58 (4.19)                   | 44 (484.2)           | 79 (800.8)       | 1.65 (1.73)                   |
| OBI to WP NAT yield rate factor  | 3.0                  | 6.8              |                               | 4.9                  | 4.2              |                               |
| <b>Lapsed + Repeat donations</b> | <b>424521</b>        | <b>318761</b>    |                               | <b>684530</b>        | <b>691235</b>    |                               |
| Window period                    | 9 (21.2)             | 15 (47.1)        | 2.22 (2.82)                   | 36 (52.6)            | 53 (76.7)        | 1.46 (1.58)                   |
| HBsAg+/DNA+                      | 99 (233.2)           | 64 (200.8)       | 0.86 (1.09)                   | 85 (124.2)           | 83 (120.1)       | 0.97 (1.05)                   |
| HBsAg+/DNA-                      | 16 (37.7)            | 4 (12.5)         | 0.33 (0.42)                   | 4 (5.84)             | 0 (0.0)          | 0.0 (0.0)                     |
| all HBsAg                        | 115 (270.9)          | 68 (213.3)       | 0.79                          | 89 (130.0)           | 83 (120.1)       | 0.92                          |
| OBI                              | 89 (209.6)           | 136 (426.6)      | 2.04 (2.58)                   | 50 (73.0)            | 83 (120.1)       | 1.64 (1.78)                   |
| OBI to WP NAT yield rate factor  | 9.9                  | 9.1              |                               | 1.3                  | 1.4              |                               |
| <b>All donations</b>             | <b>517072</b>        | <b>399326</b>    |                               | <b>775401</b>        | <b>789891</b>    |                               |
| Window period                    | 13 (25.1)            | 19 (47.6)        | 1.89 (2.70)                   | 45 (58.0)            | 72 (91.15)       | 1.57 (1.56)                   |
| HBsAg+/DNA+                      | 1649 (3189.1)        | 930 (2328.9)     | 0.73 (1.04)                   | 782 (1008.5)         | 825 (1044.5)     | 1.04 (1.03)                   |
| HBsAg+/DNA-                      | 159 (307.5)          | 47 (117.7)       | 0.38 (0.55)                   | 38 (49.0)            | 16 (20.3)        | 0.41 (0.41)                   |
| all HBsAg                        | 1808 (3496.6)        | 977 (2446.6)     | 0.70                          | 820 (1057.5)         | 841 (1064.6)     | 1.01                          |
| OBI                              | 101 (195.3)          | 163 (408.2)      | 2.09 (2.99)                   | 94 (121.2)           | 162 (205.1)      | 1.69 (1.68)                   |

^ between bracket is Ultrio Plus to Ultrio yield rate enhancement factor corrected for HBsAg prevalence reduction factor

**Supplementary table S2.** Projected yield rates of five infection stages (HBV marker profiles) per million donations that are expected to be detected by Ultrio Plus ID-NAT and HBsAg PRISM in four geographical regions based on observed yield rates with Ultrio ID-NAT in these regions [3] and reported Ultrio Plus over Ultrio NAT yield enhancement factors in South Africa [7] and Hong Kong [8] (see Table S1).

|                           |                      | Frist time donations               |                                       | Lapsed + Repeat donations          |                                       | All donations                      |                                        |
|---------------------------|----------------------|------------------------------------|---------------------------------------|------------------------------------|---------------------------------------|------------------------------------|----------------------------------------|
| Infection stage           | Code yield rate (U)# | UP/U factor                        | Projected yield rate (UP) per million | UP/U factor                        | Projected yield rate (UP) per million | UP/U factor                        | Projecte d yield rate (UP) per million |
| <b>South Africa</b>       |                      | n=360818                           |                                       | n=3210497                          |                                       | n=3571315                          |                                        |
| Pre-HBsAg WP NAT yield    | b <sub>u</sub>       | 2.04b <sub>u</sub>                 | 147.0                                 | 1.58b <sub>u</sub>                 | 43.8                                  | 1.56b <sub>u</sub>                 | 50.2                                   |
| HBsAg+/DNA+               | c <sub>u</sub>       | c <sub>u</sub> +0.59f <sub>u</sub> | 7459.7                                | c <sub>u</sub> +0.59f <sub>u</sub> | 101.3                                 | c <sub>u</sub> +0.59f <sub>u</sub> | 844.7                                  |
| Post-HBsAg WP NAT yield   | d <sub>u</sub>       | 1.67d <sub>u</sub>                 | 97.2                                  | 1.67d <sub>u</sub>                 | 8.8                                   | 1.67d <sub>u</sub>                 | 17.8                                   |
| HBsAg+/DNA-               | f <sub>u</sub>       | 0.41f <sub>u</sub>                 | 114.8                                 | 0.41f <sub>u</sub>                 | 0.3                                   | 0.41f <sub>u</sub>                 | 11.8                                   |
| OBI NAT yield             | g <sub>u</sub>       | 1.73g <sub>u</sub>                 | 445.9                                 | 1.78g <sub>u</sub>                 | 56.0                                  | 1.68g <sub>u</sub>                 | 91.3                                   |
| total infections          |                      |                                    | 8264.6                                |                                    | 210.2                                 |                                    | 1015.8                                 |
| <b>SE Asia</b>            |                      | n=324665                           |                                       | n=726716                           |                                       | n=1051381                          |                                        |
| Pre-HBsAg WP NAT yield    | b <sub>u</sub>       | 1.86b <sub>u</sub>                 | 63.0                                  | 2.82b <sub>u</sub>                 | 54.3                                  | 2.70b <sub>u</sub>                 | 64.2                                   |
| HBsAg+/DNA+               | c <sub>u</sub>       | c <sub>u</sub> +0.45f <sub>u</sub> | 9891.1                                | c <sub>u</sub> +0.45f <sub>u</sub> | 191.6                                 | c <sub>u</sub> +0.45f <sub>u</sub> | 3186.8                                 |
| Post-HBsAg WP NAT yield   | d <sub>u</sub>       | 4.20d <sub>u</sub>                 | 38.8                                  | 4.20d <sub>u</sub>                 | 23.1                                  | 4.20d <sub>u</sub>                 | 28.0                                   |
| HBsAg+/DNA-               | f <sub>u</sub>       | 0.55f <sub>u</sub>                 | 565.8                                 | 0.55f <sub>u</sub>                 | 18.9                                  | 0.55f <sub>u</sub>                 | 187.8                                  |
| OBI NAT yield             | g <sub>u</sub>       | 4.19g <sub>u</sub>                 | 554.9                                 | 2.58g <sub>u</sub>                 | 418.9                                 | 2.99g <sub>u</sub>                 | 463.6                                  |
| total infections          |                      |                                    | 10757.8                               |                                    | 531.8                                 |                                    | 3692.8                                 |
| <b>Mediterranean&amp;</b> |                      | n=290042                           |                                       | n=1806690                          |                                       | n=2118287                          |                                        |
| Pre-HBsAg WP NAT yield    | b <sub>u</sub>       | 2.04 b <sub>u</sub>                | 42.2                                  | 1.58b <sub>u</sub>                 | 12.2                                  | 1.56b <sub>u</sub>                 | 14.7                                   |
| HBsAg+/DNA+               | c <sub>u</sub>       | c <sub>u</sub> +0.59f <sub>u</sub> | 1877.2                                | c <sub>u</sub> +0.59f <sub>u</sub> | 15.0                                  | c <sub>u</sub> +0.59f <sub>u</sub> | 269.9                                  |
| Post-HBsAg WP NAT yield   | d <sub>u</sub>       | 1.67d <sub>u</sub>                 | 23.0                                  | 1.67d <sub>u</sub>                 | 5.5                                   | 1.67d <sub>u</sub>                 | 7.1                                    |
| HBsAg+/DNA-               | f <sub>u</sub>       | 0.41f <sub>u</sub>                 | 46.6                                  | 0.41f <sub>u</sub>                 | 0.5                                   | 0.41f <sub>u</sub>                 | 6.8                                    |
| OBI NAT yield             | g <sub>u</sub>       | 1.73g <sub>u</sub>                 | 143.2                                 | 1.78g <sub>u</sub>                 | 108.4                                 | 1.68g <sub>u</sub>                 | 107.9                                  |
| total infections          |                      |                                    | 2132.2                                |                                    | 141.7                                 |                                    | 406.3                                  |
| <b>ECN Europe&amp;</b>    |                      | n=294367                           |                                       | n=2323315                          |                                       | n=2617682                          |                                        |
| Pre-HBsAg WP NAT yield    | b <sub>u</sub>       | 2.04 b <sub>u</sub>                | 6.9                                   | 1.58b <sub>u</sub>                 | 3.4                                   | 1.56b <sub>u</sub>                 | 3.6                                    |
| HBsAg+/DNA+               | c <sub>u</sub>       | c <sub>u</sub> +0.59f <sub>u</sub> | 1483.3                                | c <sub>u</sub> +0.59f <sub>u</sub> | 5.0                                   | c <sub>u</sub> +0.59f <sub>u</sub> | 171.2                                  |
| Post-HBsAg WP NAT yield   | d <sub>u</sub>       | 1.67d <sub>u</sub>                 | 0.0                                   | 1.67d <sub>u</sub>                 | 0.0                                   | 1.67d <sub>u</sub>                 | 0.0                                    |
| HBsAg+/DNA-               | f <sub>u</sub>       | 0.41f <sub>u</sub>                 | 25.1                                  | 0.41f <sub>u</sub>                 | 0.2                                   | 0.41f <sub>u</sub>                 | 3.0                                    |
| OBI NAT yield             | g <sub>u</sub>       | 1.73g <sub>u</sub>                 | 29.4                                  | 1.78g <sub>u</sub>                 | 27.6                                  | 1.68g <sub>u</sub>                 | 26.3                                   |
| total infections          |                      |                                    | 1544.6                                |                                    | 36.1                                  |                                    | 204.1                                  |

U= Ultrio UP=Ultrio Plus

# if x = parameter for Ultrio Plus then x<sub>u</sub> is parameter for Ultrio

Supplementary Tables - manuscript viruses-1954196  
Lelie et al - Efficacy of HBV testing scenarios

**Supplementary Table S3.** HBV transmission risk for different blood components and NAT screening systems calculated using Weusten risk models [4,10] and expressed as a percentage of the HBV-NAT yield rate (detected by Ultrio Plus or ID-NAT assay of equivalent sensitivity) for WP and OBI donations respectively [9].

| Screening system                | WP transmission risk expressed as a percentage of WP ID-NAT (Ultrio Plus) yield rate<br>MID <sub>50</sub> 3.16 (range 1 -10 HBV-DNA copies per component)    |                     |                   |                    |
|---------------------------------|--------------------------------------------------------------------------------------------------------------------------------------------------------------|---------------------|-------------------|--------------------|
|                                 | RBC 10 mL plasma                                                                                                                                             | RBC 20 mL plasma    | PC 50 mL plasma   | FFP 200 mL plasma  |
| cobas MPX ID-NAT <sup>^</sup>   | 30.9 (16.6-48.4)%                                                                                                                                            | 41.2 (24.7-59.5)%   | 55.7 (37.6-74.3)% | 78.1 (59.5-96.7)%  |
| Ultrio Plus ID-NAT <sup>#</sup> | 45.9 (30.0-63.6)%                                                                                                                                            | 56.5 (39.3-74.7)%   | 71.0 (52.8-89.5)% | 93.3 (74.7-111.9)% |
| cobas MPX MP6-NAT               | 59.9 (42.3-78.2)%                                                                                                                                            | 70.9 (52.8-89.3)%   | 85.6 (67.1-104)%  | 108 (89.3-126)%    |
| Ultrio Plus MP16-NAT            | 91.5 (74.4-109.6)%                                                                                                                                           | 102.3 (84.6-120.7)% | 117 (98.6-126)%   | 139 (121-158)%     |
| HBsAg PRISM <sup>\$</sup>       | 146 (130-164)%                                                                                                                                               | 156 (139-175)%      | 171 (153-189)%    | 193 (175-212)%     |
| Screening system                | OBI transmission risk expressed as a percentage OBI ID-NAT (Ultrio Plus) yield rate*<br>MID <sub>50</sub> 316 (range 100 -1000 HBV-DNA copies per component) |                     |                   |                    |
|                                 | RBC 10 mL plasma                                                                                                                                             | RBC 20 mL plasma    | PC 50 mL plasma   | FFP 200 mL plasma  |
| cobas MPX ID-NAT <sup>^</sup>   | 0.76 (0.25-2.2)%                                                                                                                                             | 1.5 (0.5-4.0)%      | 3.3 (1.2-7.8)%    | 9.0 (4.0-14.6)%    |
| Ultrio Plus ID-NAT <sup>#</sup> | 2.9 (1.0-7.5)%                                                                                                                                               | 5.2 (1.9-12.3)%     | 10.5 (4.3-20.4)%  | 22.6 (12.3-31.4)%  |
| cobas MPX MP6-NAT               | 4.7 (1.6-12.3)%                                                                                                                                              | 8.5 (3.1-19.9)%     | 17.1 (7.0-32.3)%  | 35.5 (19.9-47.4)%  |
| Ultrio Plus MP16-NAT            | 12.5 (5.0-26.2)%                                                                                                                                             | 19.9 (8.8-37.2)%    | 33.3 (17.1-52.5)% | 56.1 (37.2-68.7)%  |
| HBsAg PRISM <sup>\$</sup>       | 21.2 (10.9-36.9)%                                                                                                                                            | 29.9 (16.4-48.6)%   | 44.5 (26.6-64.5)% | 68.0 (48.6-80.5)%  |

<sup>^</sup> 50% and 95% LOD cobas MPX 1.6 and 7.5 copies/mL according to Galel et al [13]

<sup>#</sup> 50% and 95% LOD of Ultrio Plus 4.1 and 41.2 copies/mL according to Vermeulen et al [12]

<sup>\$</sup> HBsAg PRISM seroconversion point at S/CO = 960 copies/mL [6]

\* assuming 50% of OBI NAT yield being anti-HBs positive (>10 mIU/mL) and not infectious [9,10]

**Supplementary Table S4 with Erratum .** Recalculation of probability of HBV transmission by RBC and FFP transfusion of HBsAg positive donations that are missed by HBV-DNA screening using two datasets

| Item/Parameter                                                                                                                                                                                                                                                                          | dataset Egypt   | dataset South-Africa     |
|-----------------------------------------------------------------------------------------------------------------------------------------------------------------------------------------------------------------------------------------------------------------------------------------|-----------------|--------------------------|
| Dataset from manuscript:                                                                                                                                                                                                                                                                | JVH 2022;29:330 | Transfusion 2013;53:2459 |
| 50% LOD in copies/mL on Eurohep genotype A standard dilutions tested in 96 and 12 replicates in the two papers respectively                                                                                                                                                             | 3.6             | 4.5                      |
| 95% LOD in copies/mL on Eurohep genotype A standard dilutions tested in 96 and 12 replicates in the two papers respectively                                                                                                                                                             | 40.1            | 43.1                     |
| Number of HBsAg positive donors in study                                                                                                                                                                                                                                                | 187             | ?                        |
| Number of HBsAg positive donations that were initially HBV-DNA nonreactive with previous less sensitive Ultrio assay                                                                                                                                                                    | 23              | 32                       |
| Number of Ultrio Plus replicate tests performed for viral load estimation on HBsAg positive donor samples that were initially nonreactive in previous less sensitive Ultrio assay                                                                                                       | 25              | 12                       |
| Number of HBsAg positive donor samples with less than 100% Ultrio Plus reactivity on replicate testing (number of potentially ID-NAT nonreactive HBsAg carrier donors)                                                                                                                  | 17              | 25                       |
| Number of HBsAg positive donor samples with equal or less than 50% Ultrio Plus reactivity on replicate testing (number of ID-NAT nonreactive HBsAg carrier donors that likely will be observed if Ultrio Plus instead of the previous Ultrio version had been used for donor screening) | 10              | 10                       |
| Imputed viral load in copies/mL in one HBsAg+ sample with 0/25 or 0/12 Ultrio Plus reactivity respectively                                                                                                                                                                              | 0.1             | 0.1                      |
| Lowest estimated observed viral load in copies/mL with 1/25 or 1/12 Ultrio Plus reactive results respectively                                                                                                                                                                           | 0.3             | 0.6                      |
| Highest estimated observed viral load in copies/mL with 24/25 or 11/12 Ultrio Plus reactive results respectively                                                                                                                                                                        | 47.2            | 24.2                     |
| Log viral load at 25% percentile (Q1) for Gumbel viral load distribution analysis in Weusten risk model (Transfusion 2017;57:841-849).                                                                                                                                                  | -0.003          | 0.180                    |
| Log viral load at 75% percentile (Q3) for Gumbel viral load distribution analysis in alternative Weusten risk model (Transfusion 2017;57:851-849)                                                                                                                                       | 1.115           | 0.982                    |
| 50% infectious dose (ID <sub>50</sub> ) of HBV virions (or HBV-DNA copies) estimated in late acute declining HBsAg positive phase in animal infectivity experiments reviewed in JVH paper of El Ekiaby et al.                                                                           | 316             | 316                      |
| Estimated volume (mL) of plasma in RBCs                                                                                                                                                                                                                                                 | 20              | 20                       |
| Estimated volume (mL) plasma in FFP                                                                                                                                                                                                                                                     | 200             | 200                      |
| Sum of probabilities of HBV transmission by RBC transfusion in HBsAg positive donations with less than 100% Ultrio Plus reactivity according to Weusten formula (Transfusion 2011;51:203-15)                                                                                            | 0.93            | 1.80                     |
| Sum of probabilities of HBV transmission by FFP transfusion in HBsAg positive donations with less than 100% Ultrio Plus reactivity according to Weusten formula (Transfusion 2011;51:203-15)                                                                                            | 4.57            | 7.14                     |
| Average probability of HBV transmission by RBC transfusion in HBsAg positive units with less than 100% Ultrio Plus reactivity (0.93/17 and 1.80/25 respectively)                                                                                                                        | 5.5%            | 7.2%                     |
| Average probability of HBV transmission by FFP transfusion in HBsAg positive units with less than 100% Ultrio Plus reactivity (4.57/17 and 7.14/25 respectively)                                                                                                                        | 27%             | 29%                      |
| Probability of HBV transmission by RBC transfusion based on Gumbel distribution parameters of viral loads in alternative Weusten risk model (Transfusion 2017;57:851-849)                                                                                                               | 4.7%            | 6.4%                     |
| Probability of HBV transmission by FFP transfusion based on Gumbel distribution parameters of viral loads in alternative Weusten risk model (Transfusion 2017;57:851-849)                                                                                                               | 23%             | 31%                      |
| Probability of an HBsAg positive unit to transmit HBV by RBC transfusion (0.93/187)                                                                                                                                                                                                     | 0.5%            | ?                        |
| Probability of an HBsAg positive unit to transmit HBV by FFP transfusion (4.57/187)                                                                                                                                                                                                     | 2.4%            | ?                        |

**Erratum belonging to Supplementary Table S4**

In the recently published paper of Ekiaby et al [11] it was reported that the HBV transmission risk posed by HBsAg positive blood components from Egyptian donors missed ID-NAT screening was estimated at 9-45% for 20-200 mL of transfused plasma assuming a 50% infectious dose ( $ID_{50}$ ) of 316 HBV virions. However when recalculating this risk for the Ultrio Plus assay it should have been 5.5 - 27% for 20-200 mL plasma. These proportions were reported to be 15% and 62% for HBsAg positive but ID-NAT nonreactive RBC and FFP transfusions respectively by Weusten et al [10] when using an alternative risk model based on viral load distribution. However the average probability in 25 South-African HBsAg positive units that could potentially be missed by ID-NAT Ultrio Plus screening was 7.2% and 29% for RBC and FFP transfusions respectively. Recalculation with the Weusten viral load distribution risk model shows that these percentages were estimated at 6.4% and 31% respectively.

**Supplementary Table S5.** TT-HBV transmission risk per million donations in eight HBV infection stages estimated with Weusten WP and OBI risk models for different regions and screening scenarios**South-Africa**

| Infection risk category   | First time               | LPD+ RPT | All   | First time                  | LPD+ RPT | All   |
|---------------------------|--------------------------|----------|-------|-----------------------------|----------|-------|
|                           | <b>cobas MPX ID-NAT</b>  |          |       | <b>Ultrio Plus ID-NAT</b>   |          |       |
| Pre-NAT WP residual risk  | 60.6                     | 18.0     | 20.7  | 83.1                        | 24.7     | 28.4  |
| Pre-HBsAg WP NAT yield    | 169.5                    | 50.5     | 57.9  | 147.0                       | 43.8     | 50.2  |
| HBsAg+/DNA+               | 7464.2                   | 101.3    | 845.2 | 7459.7                      | 101.3    | 844.7 |
| Post-HBsAg WP NAT yield   | 32.8                     | 3.0      | 6.0   | 29.2                        | 2.7      | 5.3   |
| Post NAT WP residual risk | 1.5                      | 0.1      | 0.3   | 5.1                         | 0.5      | 0.9   |
| HBsAg+/DNA-               | 2.4                      | 0.0      | 0.2   | 6.9                         | 0.0      | 0.7   |
| OBI NAT yield             | 150.3                    | 18.9     | 30.8  | 133.8                       | 16.8     | 27.4  |
| OBI NAT residual risk     | 6.7                      | 0.8      | 1.4   | 23.2                        | 2.9      | 4.7   |
| total infectivity risk    | 7887.8                   | 192.7    | 962.4 | 7887.8                      | 192.7    | 962.4 |
|                           | <b>cobas MPX MP6-NAT</b> |          |       | <b>Ultrio Plus MP16-NAT</b> |          |       |
| Pre-NAT WP residual risk  | 104.2                    | 31.1     | 35.6  | 150.4                       | 44.8     | 51.4  |
| Pre-HBsAg WP NAT yield    | 125.8                    | 37.5     | 43.0  | 79.7                        | 23.7     | 27.2  |
| HBsAg+/DNA+               | 7455.6                   | 101.3    | 844.3 | 7444.8                      | 101.3    | 843.2 |
| Post-HBsAg WP NAT yield   | 26.0                     | 2.4      | 4.7   | 14.9                        | 1.4      | 2.7   |
| Post NAT WP residual risk | 8.3                      | 0.8      | 1.5   | 19.3                        | 1.8      | 3.5   |
| HBsAg+/DNA-               | 11.0                     | 0.0      | 1.1   | 21.8                        | 0.0      | 2.2   |
| OBI NAT yield             | 119.1                    | 15.0     | 24.4  | 68.2                        | 8.6      | 14.0  |
| OBI NAT residual risk     | 37.9                     | 4.8      | 7.8   | 88.7                        | 11.1     | 18.2  |
| total infectivity risk    | 7887.8                   | 192.7    | 962.4 | 7887.8                      | 192.7    | 962.4 |

**South East Asia**

| Infection risk category   | First time               | LPD+ RPT | All    | First time                  | LPD+ RPT | All    |
|---------------------------|--------------------------|----------|--------|-----------------------------|----------|--------|
|                           | <b>cobas MPX ID-NAT</b>  |          |        | <b>Ultrio Plus ID-NAT</b>   |          |        |
| Pre-NAT WP residual risk  | 26.0                     | 22.4     | 26.5   | 35.6                        | 30.7     | 36.3   |
| Pre-HBsAg WP NAT yield    | 72.7                     | 62.6     | 74.0   | 63.0                        | 54.3     | 64.2   |
| HBsAg+/DNA+               | 9913.2                   | 192.4    | 3194.1 | 9891.1                      | 191.6    | 3186.8 |
| Post-HBsAg WP NAT yield   | 13.1                     | 7.8      | 9.4    | 11.6                        | 6.9      | 8.4    |
| Post NAT WP residual risk | 0.6                      | 0.3      | 0.4    | 2.0                         | 1.2      | 1.5    |
| HBsAg+/DNA-               | 11.9                     | 0.4      | 3.9    | 33.9                        | 1.1      | 11.3   |
| OBI NAT yield             | 187.0                    | 141.2    | 156.2  | 166.5                       | 125.7    | 139.1  |
| OBI NAT residual risk     | 8.3                      | 6.3      | 7.0    | 28.9                        | 21.8     | 24.1   |
| total infectivity risk    | 10232.7                  | 433.4    | 3471.6 | 10232.7                     | 433.4    | 3471.6 |
|                           | <b>cobas MPX MP6-NAT</b> |          |        | <b>Ultrio Plus MP16-NAT</b> |          |        |
| Pre-NAT WP residual risk  | 44.7                     | 38.5     | 45.5   | 64.5                        | 55.6     | 65.7   |
| Pre-HBsAg WP NAT yield    | 53.9                     | 46.5     | 55.0   | 34.2                        | 29.4     | 34.8   |
| HBsAg+/DNA+               | 9870.7                   | 190.9    | 3180.0 | 9817.6                      | 189.2    | 3162.4 |
| Post-HBsAg WP NAT yield   | 10.4                     | 6.2      | 7.5    | 5.9                         | 3.5      | 4.3    |
| Post NAT WP residual risk | 3.3                      | 2.0      | 2.4    | 7.7                         | 4.6      | 5.6    |
| HBsAg+/DNA-               | 54.3                     | 1.8      | 18.0   | 107.5                       | 3.6      | 35.7   |
| OBI NAT yield             | 148.2                    | 111.9    | 123.8  | 84.9                        | 64.1     | 70.9   |
| OBI NAT residual risk     | 47.2                     | 35.6     | 39.4   | 110.4                       | 83.4     | 92.2   |
| total infectivity risk    | 10232.7                  | 433.4    | 3471.6 | 10232.7                     | 433.4    | 3471.6 |

LPD + RPT = lapsed plus repeat

Supplementary Tables - manuscript viruses-1954196  
Lelie et al - Efficacy of HBV testing scenarios

**Supplementary Table S5 continued.**

**Mediterranean**

| <b>Infection risk category</b> | <b>First time</b>        | <b>LPD+ RPT</b> | <b>All</b> | <b>First time</b>           | <b>LPD+ RPT</b> | <b>All</b> |
|--------------------------------|--------------------------|-----------------|------------|-----------------------------|-----------------|------------|
|                                | <b>cobas MPX ID-NAT</b>  |                 |            | <b>Ultrio Plus ID-NAT</b>   |                 |            |
| Pre-NAT WP residual risk       | 17.4                     | 5.0             | 6.1        | 23.8                        | 6.9             | 8.3        |
| Pre-HBsAg WP NAT yield         | 48.7                     | 14.1            | 17.0       | 42.2                        | 12.2            | 14.7       |
| HBsAg+/DNA+                    | 1879.0                   | 15.1            | 270.1      | 1877.2                      | 15.0            | 269.9      |
| Post-HBsAg WP NAT yield        | 7.8                      | 1.9             | 2.4        | 6.9                         | 1.7             | 2.1        |
| Post NAT WP residual risk      | 0.3                      | 0.1             | 0.1        | 1.2                         | 0.3             | 0.4        |
| HBsAg+/DNA-                    | 1.0                      | 0.0             | 0.1        | 2.8                         | 0.0             | 0.4        |
| OBI NAT yield                  | 48.2                     | 36.5            | 36.3       | 42.9                        | 32.5            | 32.4       |
| OBI NAT residual risk          | 2.1                      | 1.6             | 1.6        | 7.4                         | 5.6             | 5.6        |
| total infectivity risk         | 2004.6                   | 74.3            | 333.8      | 2004.6                      | 74.3            | 333.8      |
|                                | <b>cobas MPX MP6-NAT</b> |                 |            | <b>Ultrio Plus MP16-NAT</b> |                 |            |
| Pre-NAT WP residual risk       | 29.9                     | 8.7             | 10.4       | 43.2                        | 12.5            | 15.1       |
| Pre-HBsAg WP NAT yield         | 36.1                     | 10.5            | 12.6       | 22.9                        | 6.6             | 8.0        |
| HBsAg+/DNA+                    | 1875.5                   | 15.0            | 269.6      | 1871.1                      | 15.0            | 269.0      |
| Post-HBsAg WP NAT yield        | 6.1                      | 1.5             | 1.9        | 3.5                         | 0.8             | 1.1        |
| Post NAT WP residual risk      | 2.0                      | 0.5             | 0.6        | 4.6                         | 1.1             | 1.4        |
| HBsAg+/DNA-                    | 4.5                      | 0.0             | 0.7        | 8.9                         | 0.1             | 1.3        |
| OBI NAT yield                  | 38.2                     | 28.9            | 28.8       | 21.9                        | 16.6            | 16.5       |
| OBI NAT residual risk          | 12.2                     | 9.2             | 9.2        | 28.5                        | 21.6            | 21.5       |
| total infectivity risk         | 2004.6                   | 74.3            | 333.8      | 2004.6                      | 74.3            | 333.8      |

**Central North-Europe**

| <b>Infection risk category</b> | <b>First time</b>        | <b>LPD+ RPT</b> | <b>All</b> | <b>First time</b>           | <b>LPD+ RPT</b> | <b>All</b> |
|--------------------------------|--------------------------|-----------------|------------|-----------------------------|-----------------|------------|
|                                | <b>cobas MPX ID-NAT</b>  |                 |            | <b>Ultrio Plus ID-NAT</b>   |                 |            |
| Pre-NAT WP residual risk       | 2.9                      | 1.4             | 1.5        | 3.9                         | 1.9             | 2.0        |
| Pre-HBsAg WP NAT yield         | 8.0                      | 3.9             | 4.1        | 6.9                         | 3.4             | 3.6        |
| HBsAg+/DNA+                    | 1484.2                   | 5.0             | 171.3      | 1483.3                      | 5.0             | 171.2      |
| Post-HBsAg WP NAT yield        | 0.0                      | 0.0             | 0.0        | 0.0                         | 0.0             | 0.0        |
| Post NAT WP residual risk      | 0.0                      | 0.0             | 0.0        | 0.0                         | 0.0             | 0.0        |
| HBsAg+/DNA-                    | 0.5                      | 0.0             | 0.1        | 1.5                         | 0.0             | 0.2        |
| OBI NAT yield                  | 9.9                      | 9.3             | 8.9        | 8.8                         | 8.3             | 7.9        |
| OBI NAT residual risk          | 0.4                      | 0.4             | 0.4        | 1.5                         | 1.4             | 1.4        |
| total infectivity risk         | 1505.9                   | 20.0            | 186.3      | 1505.9                      | 20.0            | 186.3      |
|                                | <b>cobas MPX MP6-NAT</b> |                 |            | <b>Ultrio Plus MP16-NAT</b> |                 |            |
| Pre-NAT WP residual risk       | 4.9                      | 2.4             | 2.5        | 7.1                         | 3.5             | 3.7        |
| Pre-HBsAg WP NAT yield         | 5.9                      | 2.9             | 3.1        | 3.8                         | 1.8             | 1.9        |
| HBsAg+/DNA+                    | 1482.3                   | 5.0             | 171.1      | 1480.0                      | 5.0             | 170.8      |
| Post-HBsAg WP NAT yield        | 0.0                      | 0.0             | 0.0        | 0.0                         | 0.0             | 0.0        |
| Post NAT WP residual risk      | 0.0                      | 0.0             | 0.0        | 0.0                         | 0.0             | 0.0        |
| HBsAg+/DNA-                    | 2.4                      | 0.0             | 0.3        | 4.8                         | 0.0             | 0.6        |
| OBI NAT yield                  | 7.8                      | 7.4             | 7.0        | 4.5                         | 4.2             | 4.0        |
| OBI NAT residual risk          | 2.5                      | 2.3             | 2.2        | 5.8                         | 5.5             | 5.2        |
| total infectivity risk         | 1505.9                   | 20.0            | 186.3      | 1505.9                      | 20.0            | 186.3      |

LPD + RPT = lapsed plus repeat

**Supplementary Table S6.** Percent TT-HBV transmission risk per million donations in eight HBV infection stages estimated with Weusten WP and OBI risk models as compared to overall risk without screening**South Africa**

| Infection risk category   | First time               | Lpd + Rpt | All    | First time                  | Lpd + Rpt | All    |
|---------------------------|--------------------------|-----------|--------|-----------------------------|-----------|--------|
|                           | <b>cobas MPX ID-NAT</b>  |           |        | <b>Ultrio Plus ID-NAT</b>   |           |        |
| Pre-NAT WP residual risk  | 0.77%                    | 9.37%     | 2.15%  | 1.05%                       | 12.84%    | 2.95%  |
| Pre-HBsAg WP NAT yield    | 2.15%                    | 26.21%    | 6.02%  | 1.86%                       | 22.73%    | 5.22%  |
| HBsAg+/DNA+               | 94.63%                   | 52.57%    | 87.82% | 94.57%                      | 52.57%    | 87.77% |
| Post-HBsAg WP NAT yield   | 0.42%                    | 1.55%     | 0.62%  | 0.37%                       | 1.38%     | 0.55%  |
| Post NAT WP residual risk | 0.02%                    | 0.07%     | 0.03%  | 0.06%                       | 0.24%     | 0.10%  |
| HBsAg+/DNA-               | 0.03%                    | 0.00%     | 0.03%  | 0.09%                       | 0.01%     | 0.07%  |
| OBI NAT yield             | 1.91%                    | 9.79%     | 3.20%  | 1.70%                       | 8.72%     | 2.84%  |
| OBI NAT residual risk     | 0.08%                    | 0.44%     | 0.14%  | 0.29%                       | 1.51%     | 0.49%  |
| total infectivity risk    | 100%                     | 100%      | 100%   | 100%                        | 100%      | 100%   |
|                           | <b>cobas MPX MP6-NAT</b> |           |        | <b>Ultrio Plus MP16-NAT</b> |           |        |
| Pre-NAT WP residual risk  | 1.32%                    | 16.12%    | 3.70%  | 1.91%                       | 23.26%    | 5.34%  |
| Pre-HBsAg WP NAT yield    | 1.60%                    | 19.46%    | 4.47%  | 1.01%                       | 12.32%    | 2.83%  |
| HBsAg+/DNA+               | 94.52%                   | 52.56%    | 87.73% | 94.38%                      | 52.55%    | 87.61% |
| Post-HBsAg WP NAT yield   | 0.33%                    | 1.23%     | 0.49%  | 0.19%                       | 0.70%     | 0.28%  |
| Post NAT WP residual risk | 0.10%                    | 0.39%     | 0.16%  | 0.25%                       | 0.91%     | 0.37%  |
| HBsAg+/DNA-               | 0.14%                    | 0.01%     | 0.12%  | 0.28%                       | 0.03%     | 0.23%  |
| OBI NAT yield             | 1.51%                    | 7.76%     | 2.53%  | 0.86%                       | 4.45%     | 1.45%  |
| OBI NAT residual risk     | 0.48%                    | 2.47%     | 0.81%  | 1.12%                       | 5.78%     | 1.89%  |
| total infectivity risk    | 100%                     | 100%      | 100%   | 100%                        | 100%      | 100%   |

**South-East Asia**

| Infection risk category   | First time               | Lpd + Rpt | All    | First time                  | Lpd + Rpt | All    |
|---------------------------|--------------------------|-----------|--------|-----------------------------|-----------|--------|
|                           | <b>cobas MPX ID-NAT</b>  |           |        | <b>Ultrio Plus ID-NAT</b>   |           |        |
| Pre-NAT WP residual risk  | 0.25%                    | 5.16%     | 0.76%  | 0.35%                       | 7.08%     | 1.04%  |
| Pre-HBsAg WP NAT yield    | 0.71%                    | 14.45%    | 2.13%  | 0.62%                       | 12.54%    | 1.85%  |
| HBsAg+/DNA+               | 96.88%                   | 44.39%    | 92.01% | 96.66%                      | 44.22%    | 91.80% |
| Post-HBsAg WP NAT yield   | 0.13%                    | 1.80%     | 0.27%  | 0.11%                       | 1.60%     | 0.24%  |
| Post NAT WP residual risk | 0.01%                    | 0.08%     | 0.01%  | 0.02%                       | 0.28%     | 0.04%  |
| HBsAg+/DNA-               | 0.12%                    | 0.09%     | 0.11%  | 0.33%                       | 0.26%     | 0.32%  |
| OBI NAT yield             | 1.83%                    | 32.58%    | 4.50%  | 1.63%                       | 29.00%    | 4.01%  |
| OBI NAT residual risk     | 0.08%                    | 1.45%     | 0.20%  | 0.28%                       | 5.03%     | 0.69%  |
| total infectivity risk    | 100%                     | 100%      | 100%   | 100%                        | 100%      | 100%   |
|                           | <b>cobas MPX MP6-NAT</b> |           |        | <b>Ultrio Plus MP16-NAT</b> |           |        |
| Pre-NAT WP residual risk  | 0.44%                    | 8.89%     | 1.31%  | 0.63%                       | 12.82%    | 1.89%  |
| Pre-HBsAg WP NAT yield    | 0.53%                    | 10.73%    | 1.58%  | 0.33%                       | 6.79%     | 1.00%  |
| HBsAg+/DNA+               | 96.46%                   | 44.06%    | 91.60% | 95.94%                      | 43.65%    | 91.09% |
| Post-HBsAg WP NAT yield   | 0.10%                    | 1.42%     | 0.22%  | 0.06%                       | 0.82%     | 0.12%  |
| Post NAT WP residual risk | 0.03%                    | 0.45%     | 0.07%  | 0.08%                       | 1.06%     | 0.16%  |
| HBsAg+/DNA-               | 0.53%                    | 0.42%     | 0.52%  | 1.05%                       | 0.83%     | 1.03%  |
| OBI NAT yield             | 1.45%                    | 25.81%    | 3.57%  | 0.83%                       | 14.79%    | 2.04%  |
| OBI NAT residual risk     | 0.46%                    | 8.22%     | 1.13%  | 1.08%                       | 19.24%    | 2.66%  |
| total infectivity risk    | 100%                     | 100%      | 100%   | 100%                        | 100%      | 100%   |



Supplemental table S6 continued

## Mediterranean

| Infection risk category   | First time        | Lpd + Rpt | All    | First time           | Lpd + Rpt | All    |
|---------------------------|-------------------|-----------|--------|----------------------|-----------|--------|
|                           | cobas MPX ID-NAT  |           |        | Ultrio Plus ID-NAT   |           |        |
| Pre-NAT WP residual risk  | 0.87%             | 6.79%     | 1.82%  | 1.19%                | 9.31%     | 2.49%  |
| Pre-HBsAg WP NAT yield    | 2.43%             | 18.99%    | 5.09%  | 2.11%                | 16.47%    | 4.41%  |
| HBsAg+/DNA+               | 93.74%            | 20.26%    | 80.93% | 93.65%               | 20.24%    | 80.85% |
| Post-HBsAg WP NAT yield   | 0.39%             | 2.51%     | 0.72%  | 0.34%                | 2.24%     | 0.64%  |
| Post NAT WP residual risk | 0.02%             | 0.11%     | 0.03%  | 0.06%                | 0.39%     | 0.11%  |
| HBsAg+/DNA-               | 0.05%             | 0.01%     | 0.04%  | 0.14%                | 0.04%     | 0.12%  |
| OBI NAT yield             | 2.41%             | 49.13%    | 10.89% | 2.14%                | 43.74%    | 9.69%  |
| OBI NAT residual risk     | 0.11%             | 2.19%     | 0.48%  | 0.37%                | 7.58%     | 1.68%  |
| total infectivity risk    | 100%              | 100%      | 100%   | 100%                 | 100%      | 100%   |
|                           | cobas MPX MP6-NAT |           |        | Ultrio Plus MP16-NAT |           |        |
| Pre-NAT WP residual risk  | 1.49%             | 11.68%    | 3.13%  | 2.15%                | 16.85%    | 4.51%  |
| Pre-HBsAg WP NAT yield    | 1.80%             | 14.10%    | 3.78%  | 1.14%                | 8.93%     | 2.39%  |
| HBsAg+/DNA+               | 93.56%            | 20.22%    | 80.78% | 93.34%               | 20.16%    | 80.59% |
| Post-HBsAg WP NAT yield   | 0.31%             | 1.99%     | 0.57%  | 0.18%                | 1.14%     | 0.33%  |
| Post NAT WP residual risk | 0.10%             | 0.63%     | 0.18%  | 0.23%                | 1.48%     | 0.42%  |
| HBsAg+/DNA-               | 0.22%             | 0.06%     | 0.19%  | 0.44%                | 0.12%     | 0.39%  |
| OBI NAT yield             | 1.91%             | 38.93%    | 8.63%  | 1.09%                | 22.31%    | 4.94%  |
| OBI NAT residual risk     | 0.61%             | 12.39%    | 2.75%  | 1.42%                | 29.01%    | 6.43%  |
| total infectivity risk    | 100%              | 100%      | 100%   | 100%                 | 100%      | 100%   |

## Central-North Europe

| Infection risk category   | First time        | Lpd + Rpt | All    | First time           | Lpd + Rpt | All    |
|---------------------------|-------------------|-----------|--------|----------------------|-----------|--------|
|                           | cobas MPX ID-NAT  |           |        | Ultrio Plus ID-NAT   |           |        |
| Pre-NAT WP residual risk  | 0.19%             | 6.99%     | 0.79%  | 0.26%                | 9.59%     | 1.08%  |
| Pre-HBsAg WP NAT yield    | 0.53%             | 19.57%    | 2.21%  | 0.46%                | 16.98%    | 1.92%  |
| HBsAg+/DNA+               | 98.56%            | 24.94%    | 91.99% | 98.49%               | 24.91%    | 91.93% |
| Post-HBsAg WP NAT yield   | 0.00%             | 0.00%     | 0.00%  | 0.00%                | 0.00%     | 0.00%  |
| Post NAT WP residual risk | 0.00%             | 0.00%     | 0.00%  | 0.00%                | 0.00%     | 0.00%  |
| HBsAg+/DNA-               | 0.03%             | 0.02%     | 0.03%  | 0.10%                | 0.05%     | 0.10%  |
| OBI NAT yield             | 0.66%             | 46.41%    | 4.76%  | 0.59%                | 41.31%    | 4.24%  |
| OBI NAT residual risk     | 0.03%             | 2.07%     | 0.21%  | 0.10%                | 7.16%     | 0.73%  |
| total infectivity risk    | 100%              | 100%      | 100%   | 100%                 | 100%      | 100%   |
|                           | cobas MPX MP6-NAT |           |        | Ultrio Plus MP16-NAT |           |        |
| Pre-NAT WP residual risk  | 0.33%             | 12.04%    | 1.36%  | 0.47%                | 17.37%    | 1.96%  |
| Pre-HBsAg WP NAT yield    | 0.39%             | 14.53%    | 1.64%  | 0.25%                | 9.20%     | 1.04%  |
| HBsAg+/DNA+               | 98.43%            | 24.87%    | 91.87% | 98.28%               | 24.79%    | 91.72% |
| Post-HBsAg WP NAT yield   | 0.00%             | 0.00%     | 0.00%  | 0.00%                | 0.00%     | 0.00%  |
| Post NAT WP residual risk | 0.00%             | 0.00%     | 0.00%  | 0.00%                | 0.00%     | 0.00%  |
| HBsAg+/DNA-               | 0.16%             | 0.08%     | 0.15%  | 0.32%                | 0.17%     | 0.30%  |
| OBI NAT yield             | 0.52%             | 36.77%    | 3.77%  | 0.30%                | 21.07%    | 2.16%  |
| OBI NAT residual risk     | 0.17%             | 11.70%    | 1.20%  | 0.39%                | 27.40%    | 2.81%  |
| total infectivity risk    | 100%              | 100%      | 100%   | 100%                 | 100%      | 100%   |

LPD + RPT = lapsed plus repeat
